# Supplementary material for: Core–shell structured Fe–N–C wrapped by an ultrathin porous carbon shell as a robust electrocatalyst for the oxygen reduction reaction
Source: Royal Society of Chemistry journal article supplement (doi:10.1039/d3nj00431g), 2023-01-01
Supplement: d3nj00431g1.pdf [file d3nj00431g1.pdf]

## Supporting Information

Core-shell Fe-N-C nanocatalyst with ultrathin porous carbon shell as a robust  
electrocatalyst for oxygen reduction reaction

Bin Yue<sup>a</sup>, Kang Yang<sup>a</sup>, Huaming Xie<sup>a</sup>, Ying Lei<sup>\*a</sup>, Jianying Li<sup>a</sup>, Yujun Si<sup>b</sup>

*<sup>a</sup>College of Chemical Engineering, Sichuan University of Science and Engineering,  
Zigong 643000, PR China*

*<sup>b</sup>College of Chemistry and Environmental Engineering, Sichuan University of Science  
and Engineering, Zigong 643000, PR China*

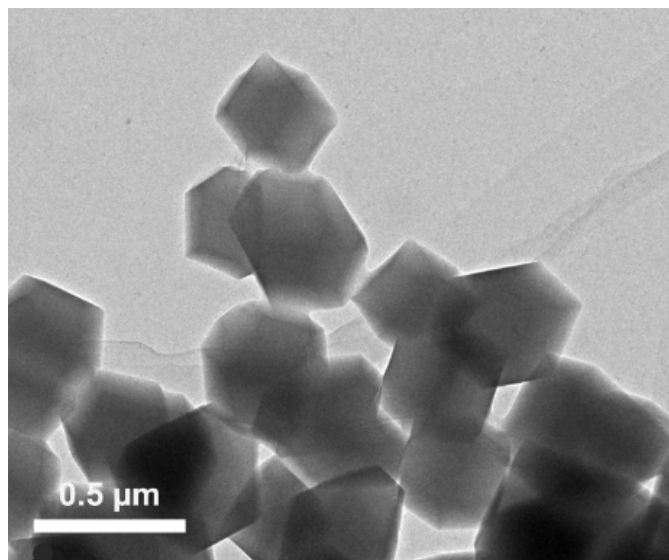

**Figure. S1** TEM image of Fe-ZIF-8@PVP

**Table S1.** Pore structure characteristics of Fe-N-C@NC and Fe-N-C

| Sample    | surface area<br>(m <sup>2</sup> g <sup>-1</sup> ) | pore volume<br>(cm <sup>3</sup> g <sup>-1</sup> ) | pore diameter<br>(nm) |
|-----------|---------------------------------------------------|---------------------------------------------------|-----------------------|
| Fe-N-C@NC | 1163.9619                                         | 1.1459                                            | 3.9379                |
| Fe-N-C    | 579.2399                                          | 0.9750                                            | 6.7330                |

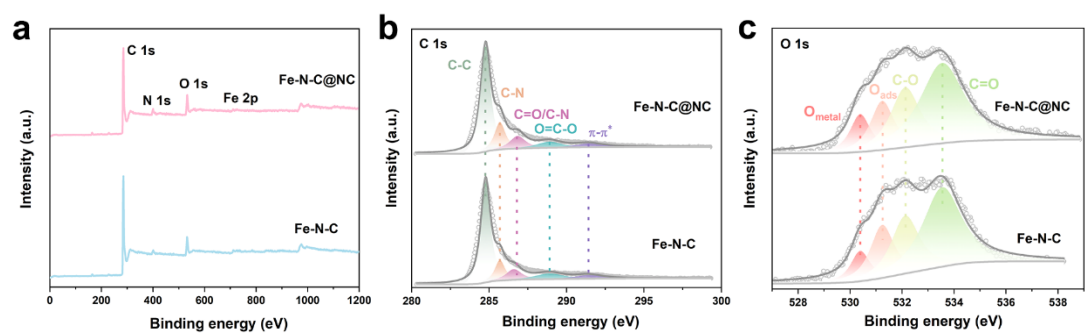

**Figure. S2** High-resolution XPS spectra of (a) survey, (b) C 1s and (c) O 1s for Fe-N-C@NC and Fe-N-C.

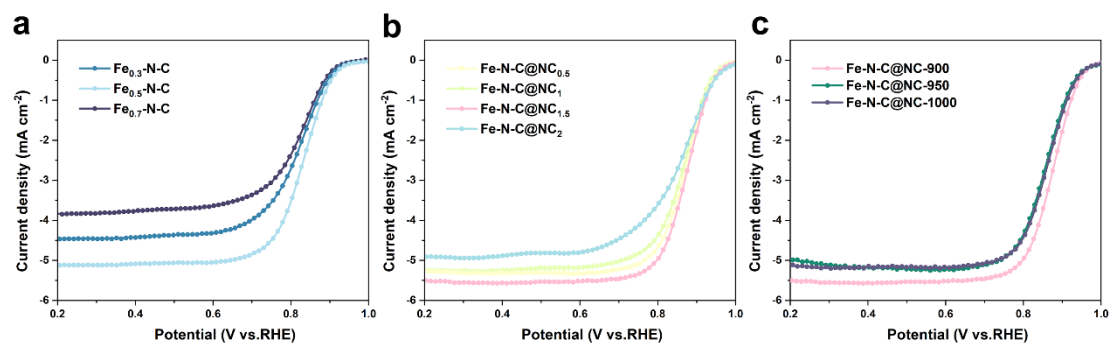

**Figure. S3** (a) LSV curves of Fe-N-C with different molar of metallic iron (0.3 mmol, 0.5mmol and 0.7 mmol), (b) LSV curves of Fe-N-C@NC with different grams of polyvinylpyrrolidone (0.5g, 1g, 1.5g, 2g, with optimal metallic iron additions) and (c) LSV curves of Fe-N-C@NC with different pyrolysis temperatures (900 °C, 950 °C and 1000 °C)

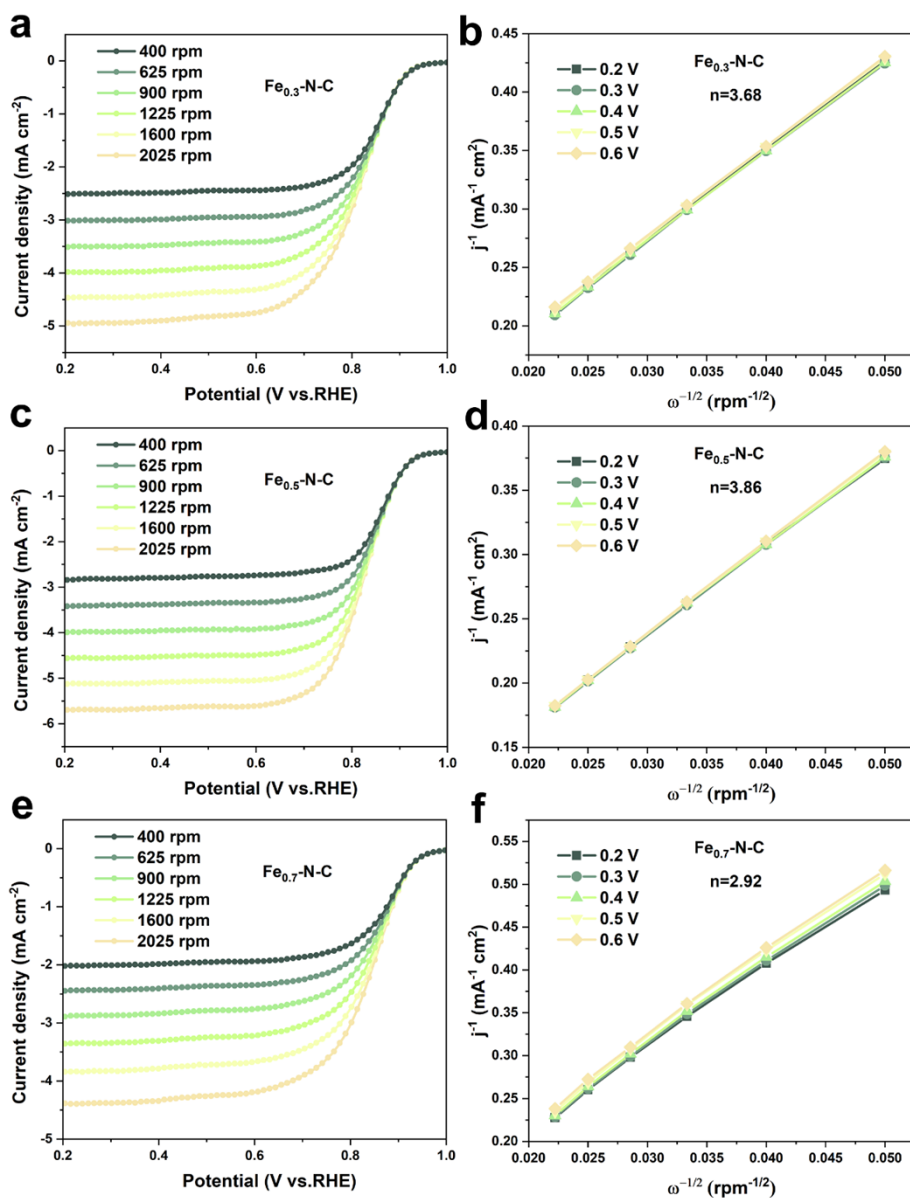

**Figure. S4** LSV curves at various rotation rates for the ORR and the corresponding K-L plots for (a, b) Fe<sub>0.3</sub>-N-C, (c, d) Fe<sub>0.5</sub>-N-C, and (e, f) Fe<sub>0.7</sub>-N-C in the O<sub>2</sub>-saturated 0.1 M KOH solution, respectively.

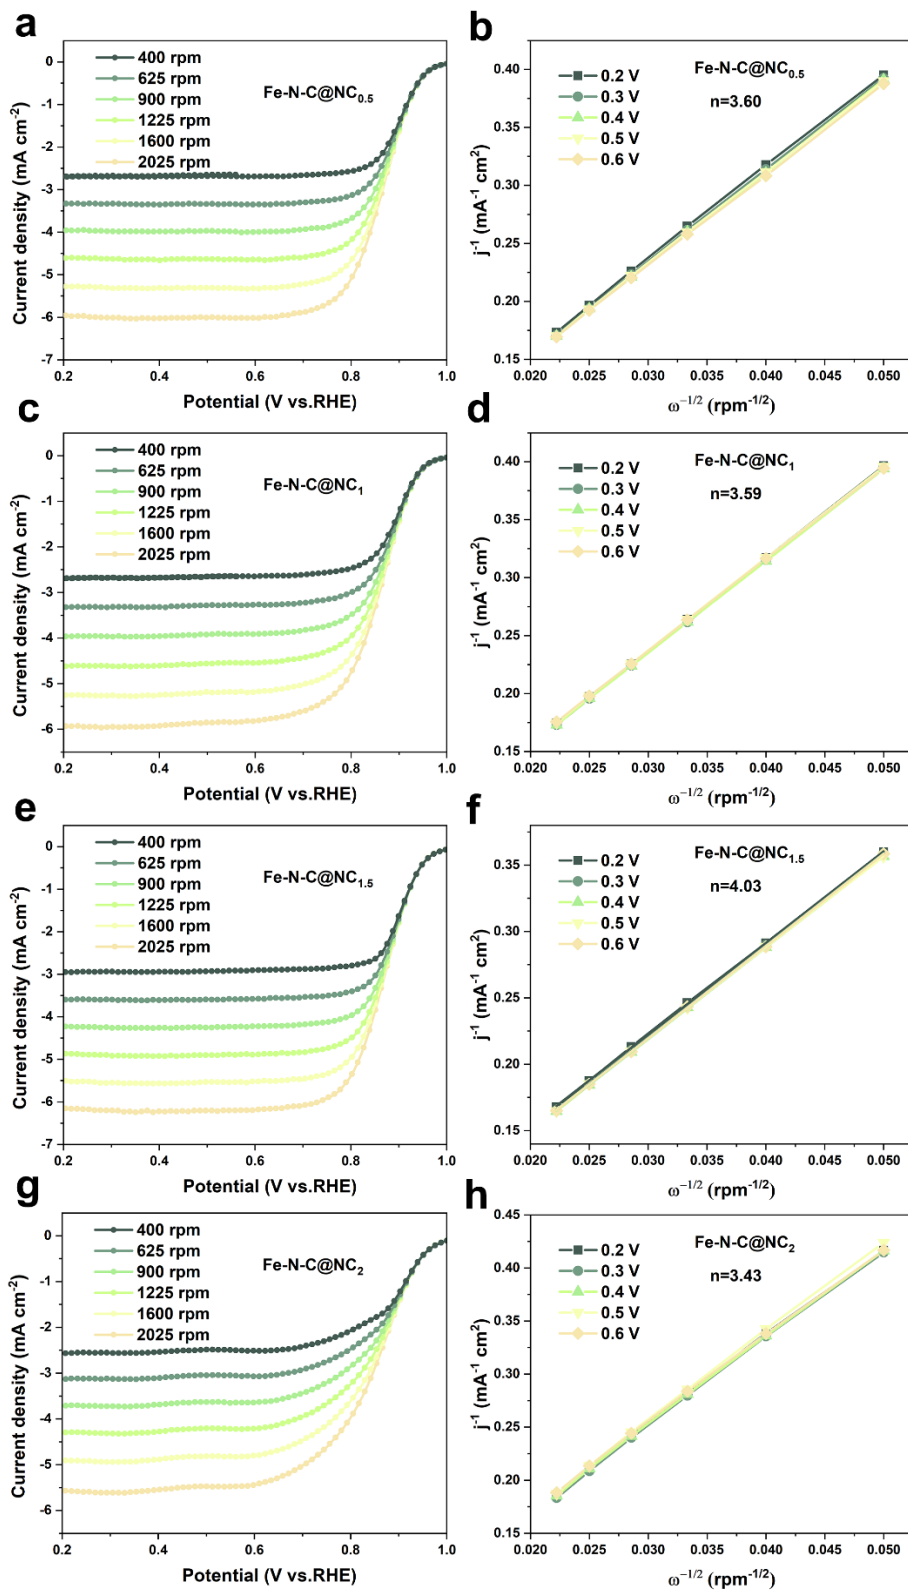

**Figure. S5** LSV curves at various rotation rates for the ORR and the corresponding K-L plots for (a, b) Fe-N-C@NC<sub>0.5</sub>, (c, d) Fe-N-C@NC<sub>1</sub>, (e, f) Fe-N-C@NC<sub>1.5</sub>, and (g, h) Fe-N-C@NC<sub>2</sub> in the O<sub>2</sub>-saturated 0.1 M KOH solution, respectively.

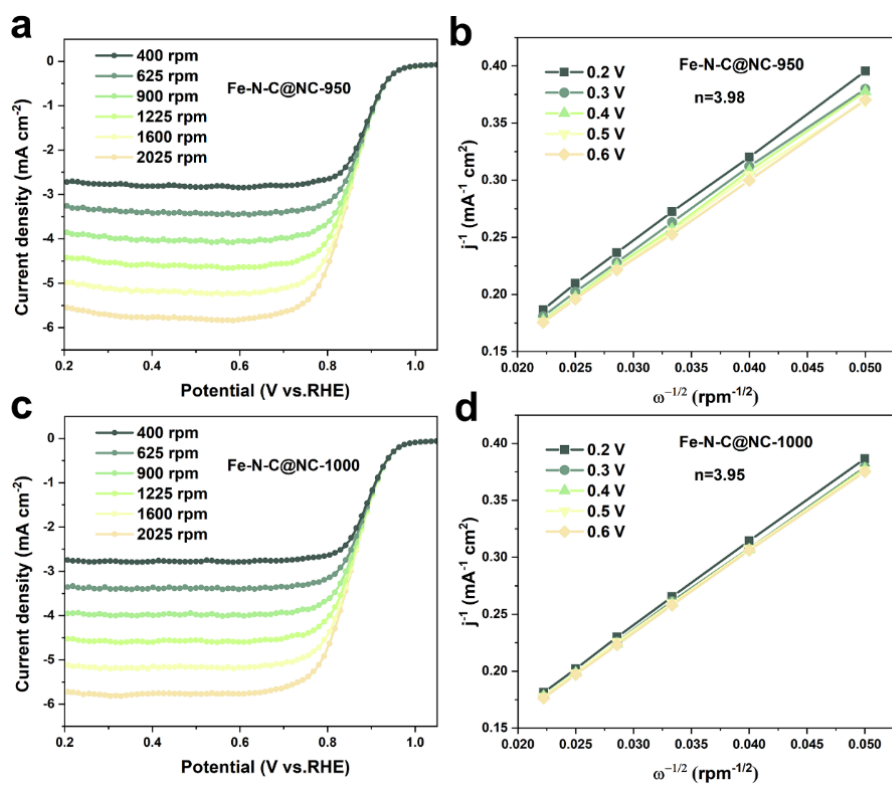

**Figure. S6** LSV curves at various rotation rates for the ORR and the corresponding K-L plots for (a, b) Fe-N-C@NC-950 and (c, d) Fe-N-C@NC-1000 in the O<sub>2</sub>-saturated 0.1 M KOH solution, respectively



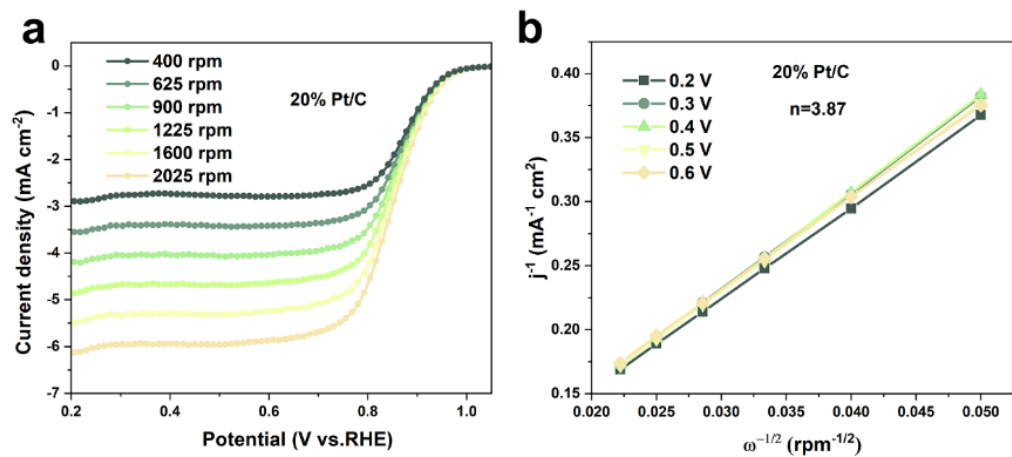

**Figure. S7** LSV curves at various rotation rates for the ORR and the corresponding K-L plots for 20% Pt/C in the  $\text{O}_2$ -saturated 0.1 M KOH solution.

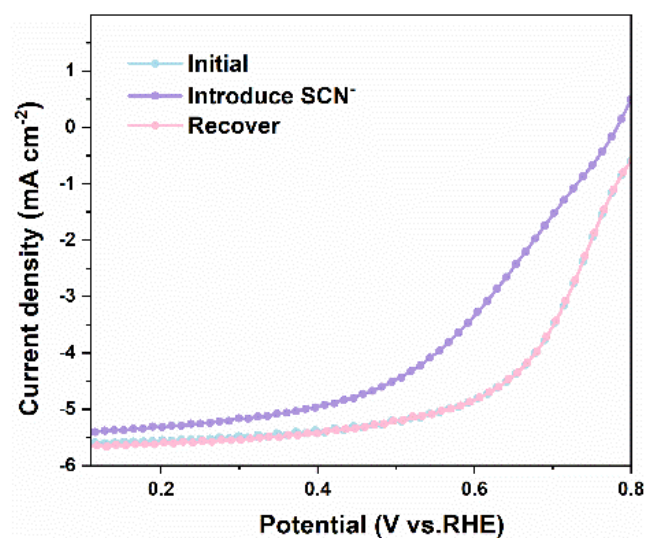

**Figure. S8** LSV curves of Fe-N-C@NC before and after adding 5 mM NaSCN into 0.05M H<sub>2</sub>SO<sub>4</sub>. Electrode rotation speed, 1600 rpm; scan rate, 10 mV/s.

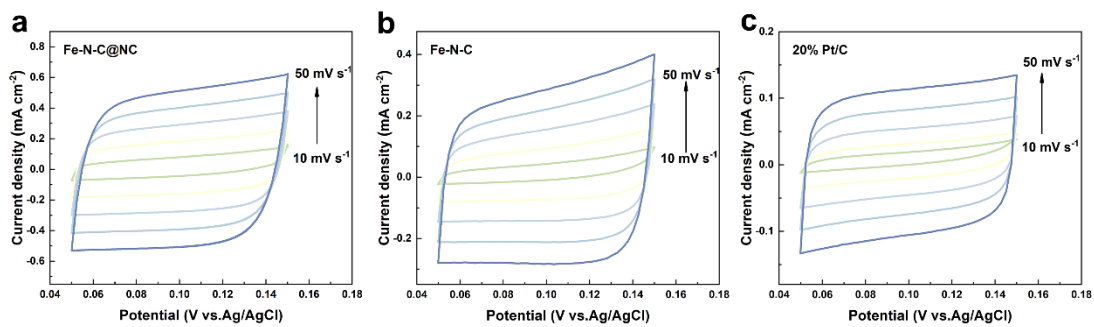

**Figure. S9** CV at scan rates of 10, 20, 30, 40 and 50 mV s<sup>-1</sup> in 0.1 M KOH electrolyte for (a) Fe-N-C@NC, (b) Fe-N-C and (c) 20% Pt/C.

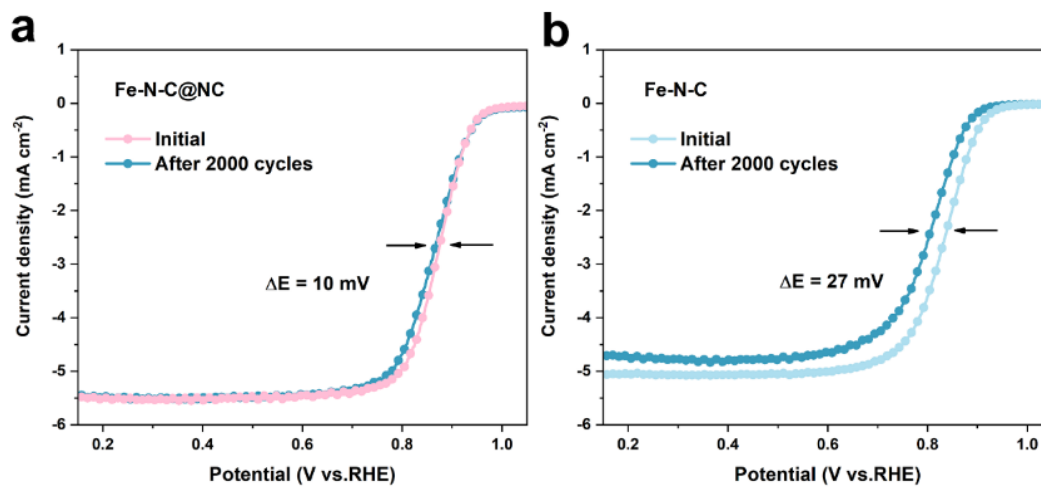

**Figure. S10** LSV curves of Fe-N-C@NC and Fe-N-C after ADT.

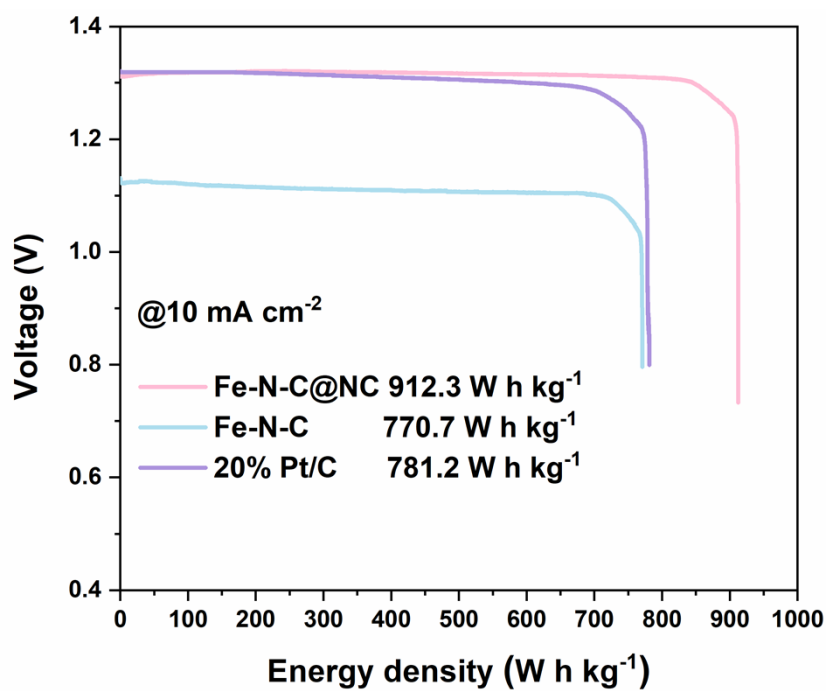

**Figure. S11** voltage-energy density curves for different current densities.

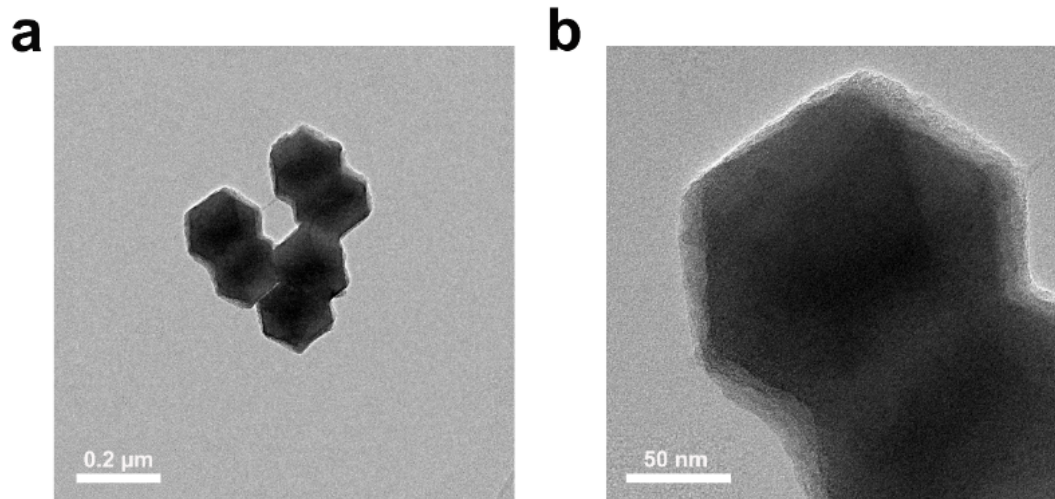

**Figure. S12** TEM was used to test the Fe-N-C@NC material after cycling, and it was found that its morphology and structure were well preserved.

**Table S2** Elemental analysis parameters of samples

| Sample    | C (at%)     | N (at%) | O (at%) | Fe (at%) |      |
|-----------|-------------|---------|---------|----------|------|
| Fe-N-C@NC | initial     | 80.87   | 3.27    | 14.65    | 1.21 |
|           | after 150 h | 79.97   | 0.65    | 18.35    | 1.03 |
| Fe-N-C    | initial     | 80.54   | 2.97    | 14.44    | 2.05 |
|           | after 150 h | 74.94   | 0.64    | 24.24    | 0.18 |

**Table S3** Electrochemical performance of Zn-air batteries with our catalysts and other advanced catalysts reported recently.

| <b>Catalyst</b>                | <b>Catalyst loading (mg cm<sup>-2</sup>)</b> | <b>Peak power density (mW cm<sup>-2</sup>)</b> | <b>Cycling time (h)</b> | <b>Reference</b> |
|--------------------------------|----------------------------------------------|------------------------------------------------|-------------------------|------------------|
| Fe-N-C@NC                      | 1.0                                          | 170.8                                          | 150                     | This work        |
| FeS/Fe <sub>3</sub> C@NS-C-900 | 1.25                                         | 90.9                                           | 865                     | 1                |
| CeO <sub>2</sub> -FeNC-5       | 4.0                                          | 169                                            | 200                     | 2                |
| Fe-N-C/2rGO                    | 1.0                                          | 164                                            | 30                      | 3                |
| FeNC-0.04                      | 1.0                                          | 165                                            | -                       | 4                |
| NiFe(1:2)P/Pi                  | 2.0                                          | 395                                            | 100                     | 5                |
| Fe-KJB-3-60A                   | 0.15                                         | 251                                            | 156                     | 6                |
| Co SAs@PNCN                    | 1.0                                          | 220                                            | 89                      | 7                |
| Fe-N/S-HPC                     | 1.0                                          | 188.4                                          | 240                     | 8                |
| Fe/Co/Zn-CNZIF                 | -                                            | 156.7                                          | 137                     | 9                |



## Reference

1. Y. W. Li, W. J. Zhang, J. Li, H. Y. Ma, H. M. Du, D. C. Li, S. N. Wang, J. S. Zhao, J. M. Dou and L. Xu, Fe-MOF-Derived Efficient ORR/OER Bifunctional Electrocatalyst for Rechargeable Zinc-Air Batteries, *ACS Appl. Mater. Interfaces*, 2020, **40**, 44710-44719.
2. Y. Huang, Y. Zhang, J. Hao, Y. Wang, J. Yu, Y. Liu, Z. Tian, T. S. Chan, M. Liu, W. Li and J. Li, Tuning the coordination environment of Fe atoms enables 3D porous Fe/N-doped carbons as bifunctional electrocatalyst for rechargeable zinc-air battery, *J. Colloid Interface Sci.*, 2022, **628**, 1067-1076.
3. X. Zhao, L. Shao, Z. Wang, H. Chen, H. Yang and L. Zeng, In situ atomically dispersed Fe doped metal-organic framework on reduced graphene oxide as bifunctional electrocatalyst for Zn-air batteries, *J. Mater. Chem. C*, 2021, **34**, 11252-11260.
4. Z. Meng, N. Chen, S. Cai, J. Wu, R. Wang, T. Tian and H. Tang, Rational design of hierarchically porous Fe-N-doped carbon as efficient electrocatalyst for oxygen reduction reaction and Zn-air batteries, *Nano Res.*, 2021, **12**, 4768-4775.
5. N. Thakur, M. Kumar, D. Mandal and T. C. Nagaiah, Nickel Iron Phosphide/Phosphate as an Oxygen Bifunctional Electrocatalyst for High-Power-Density Rechargeable Zn-Air Batteries, *ACS Appl. Mater. Interfaces*, 2021, **44**, 52487-52497.
6. M. Wang, B. Huang, N. Jiang, T. Liu, J. Huang and L. Guan, An Fe-N-C electrocatalyst with dense active sites synthesized by expeditious pyrolysis of a natural Fe-N<sub>4</sub> macrocyclic complex, *J. Mater. Chem. A*, 2022, **43**, 23001-23007.
7. M. Zhang, H. Li, J. Chen, F. X. Ma, L. Zhen, Z. Wen and C. Y. Xu, Transition Metal (Co, Ni, Fe, Cu) Single-Atom Catalysts Anchored on 3D Nitrogen-Doped Porous Carbon Nanosheets as Efficient Oxygen Reduction Electrocatalysts for Zn-Air Battery, *Small*, 2022, **34**, 2202476.
8. M. Wang, X. Du, M. Zhang, K. Su and Z. Li, From S-rich polyphenylene sulfide to honeycomb-like porous carbon with ultrahigh specific surface area as bifunctional electrocatalysts for rechargeable Zn-air batteries, *Carbon*, 2022, **198**, 264-274.

9. Z. Guo, Y. Ma, Y. Zhao, Y. Song, S. Tang, Q. Wang and W. Li, Trimetallic ZIFs-derived porous carbon as bifunctional electrocatalyst for rechargeable Zn-air battery, *J. Power Sources*, 2022, **542**, 231723.
